# Supplementary material for: One-step synthesis of MnOx/PPy nanocomposite as a high-performance cathode for a rechargeable zinc-ion battery and insight into its energy storage mechanism
Source: Royal Society of Chemistry journal article supplement (doi:10.1039/c9nr09870d), 2020-01-01
Supplement: c9nr09870d1.pdf [file c9nr09870d1.pdf]

## Supporting Information

### **One-step synthesis of MnO<sub>x</sub>/PPy nanocomposite as a high-performance cathode for rechargeable zinc-ion battery and insight into its energy storage mechanism**

Zixuan Li<sup>a</sup>, Yuan Huang<sup>a,\*</sup>, Jiyan Zhang<sup>a</sup>, Shunyu Jin<sup>b</sup>, Shengdong Zhang<sup>a</sup>, Hang Zhou<sup>a,\*</sup>

<sup>a</sup> *School of Electronic and Computer Engineering, Peking University Shenzhen Graduate School, Shenzhen 518055, PR China*

<sup>b</sup> *Center for Micro- and Nanoscale Research and Fabrication, University of Science and Technology of China, Hefei 23000, PR China*

\* Corresponding author.

E-mail addresses: [huangyuan@pkusz.edu.cn](mailto:huangyuan@pkusz.edu.cn) (Y. Huang), [zhouh81@pkusz.edu.cn](mailto:zhouh81@pkusz.edu.cn) (H. Zhou)

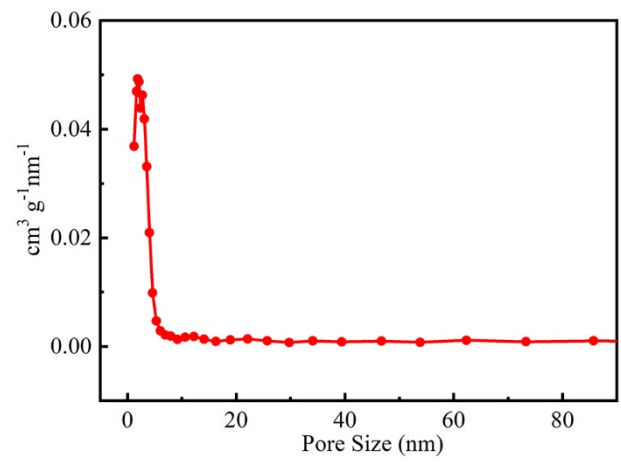

**Fig. S1.** Pore size distribution of the  $\text{MnO}_x/\text{PPy}$  composite.

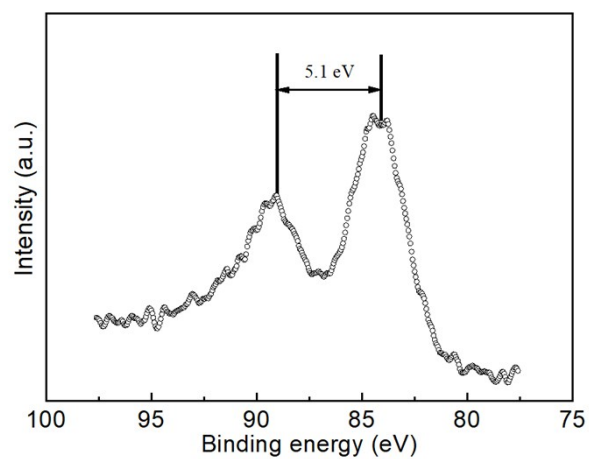

**Fig. S2.** Mn 3s XPS spectrum of the MnO<sub>x</sub>/PPy composite.

The XPS of the Mn 3s regions was further performed. As shown in Fig. S2, the energy differences of Mn 3s multiplet splittings for MnO<sub>x</sub>/PPy is 5.1 eV. The value is consistent with the mixed (III and IV) valences of Mn (5.5 eV for Mn<sub>2</sub>O<sub>3</sub>; 4.5 eV for MnO<sub>2</sub>) [1,2].

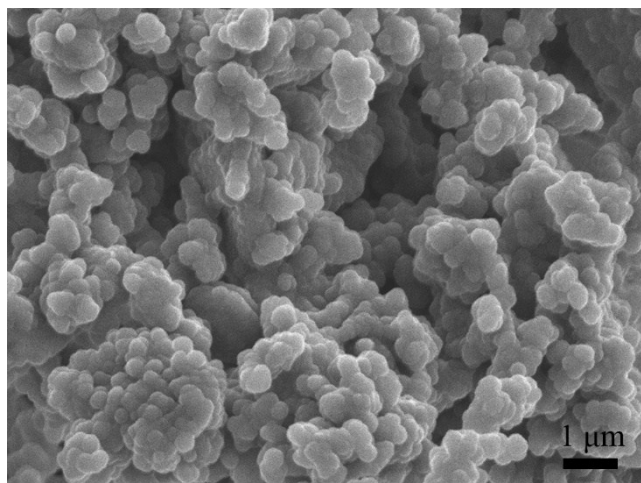

**Fig. S3.** SEM image of pure PPy electrode.

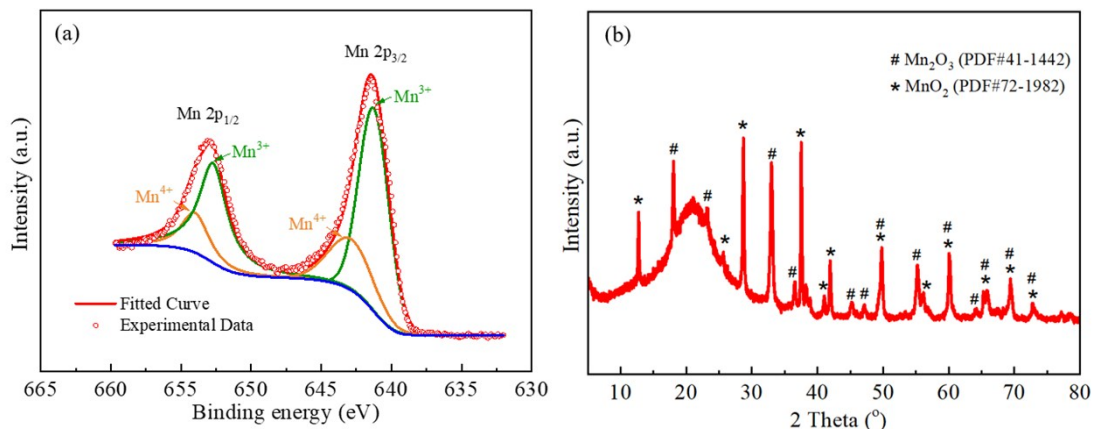

**Fig. S4.** (a) XPS and (b) XRD pattern of the MnO<sub>x</sub>.

The MnO<sub>x</sub>/PPy composite was heat treated at 500 °C in air to remove the shielding of PPy. The XPS and XRD results of MnO<sub>x</sub> (Fig. S4) verified the coexistence of Mn<sup>3+</sup> and Mn<sup>4+</sup> in the MnO<sub>x</sub>. However, compared with XPS result of MnO<sub>x</sub>/PPy, the Mn<sup>3+</sup>/Mn<sup>4+</sup> ratio in the MnO<sub>x</sub> is higher than that in the MnO<sub>x</sub>/PPy composite. Moreover, the crystallinity of MnO<sub>x</sub> increases.

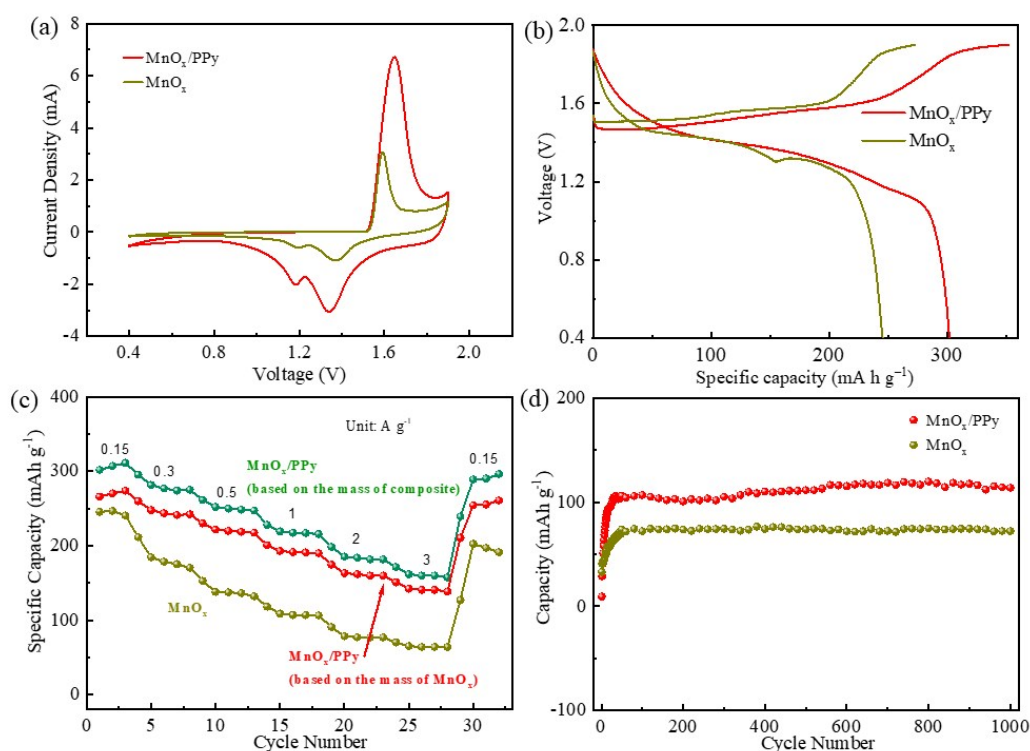

**Fig. S5.** (a) Cyclic voltammograms of Zn-MnO<sub>x</sub>/PPy and Zn-MnO<sub>x</sub> batteries. (b) Discharge/charge profiles of Zn-MnO<sub>x</sub>/PPy and Zn-MnO<sub>x</sub> batteries at a 0.15 A g<sup>-1</sup>. (d) Rate capability of Zn-MnO<sub>x</sub>/PPy and Zn-MnO<sub>x</sub> batteries. (f) Long-term cycling performance of Zn-MnO<sub>x</sub>/PPy and Zn-MnO<sub>x</sub> batteries at 6 A g<sup>-1</sup>.

Fig. S5 shows that the MnO<sub>x</sub> electrodes show poor capacity and rate performance when compared with MnO<sub>x</sub>/PPy electrodes.

---

The reactions of the rechargeable aqueous Zn- MnO<sub>x</sub>/PPy batteries can be formulated as below. [3-7]

MnO<sub>x</sub>/PPy Cathode reactions:

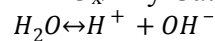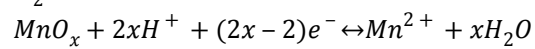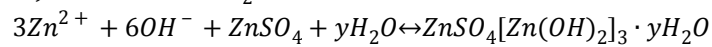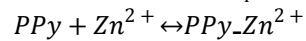

MnO<sub>x</sub>/PPy Anode reaction:

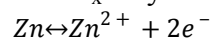

### Reference:

- [1] L. Du, S. Yu, X. Liu and Y. Ding, *Appl. Surf. Sci.*, 2019, 486, 460-465.
- [2] W. Tang, H. Liu, X. Wu and Y. Chen, *Ozone-Sci. Eng.*, 2104, 36, 502-512.
- [3] Z. Guo, Y. Ma, X. Dong, J. Huang, Y. Wang and Y. Xia, *Angew. Chem.*, 2018, 130, 11911-11915.
- [4] N. Palaniyandy, M. Kebede, K. Raju, K. Ozoemena, L. le Roux, M. Mathe and R. Jayaprakasam, *Mater. Chem. Phys.*, 2019, 230, 258-266.
- [5] J. Hao, J. Mou, J. Zhang, L. Dong, W. Liu, C. Xu and F. Kang, *Electrochim. Acta*, 2018, 259, 170-178.
- [6] H. Pan, Y. Shao, P. Yan, Y. Cheng, K. Han and Z. Nie, *Nat. Energy*, 2016, 1, 16039.
- [7] N. Zhang, F. Cheng, J. Liu, L. Wang, X. Long, X. Liu and J. Chen, *Nat. Commun.*, 2017, 8, 405.
